# Supplementary material for: Comparative Cost-Effectiveness Analysis of Respiratory Syncytial Virus Vaccines for Older Adults in Hong Kong
Source: MDPI journal article supplement (doi:10.3390/vaccines11101605), 2023-10-17
Supplement: s1 [file s1]

## **Supplementary materials**

**Title: Comparative cost-effectiveness analysis of respiratory syncytial virus vaccines for older adults in Hong Kong**

**Table S1.** Search strategy of MEDLINE

**Figure S1.** Flow diagram of literature search and selection process for clinical inputs

**Table S2.** Threshold values of influential parameters on the ICER of AREXVY® (versus no vaccination) in one-way sensitivity analysis at 25% US vaccine price level

**Table S1.** Search strategy of MEDELIN

| # | Query                                                                                                                                                             |
|---|-------------------------------------------------------------------------------------------------------------------------------------------------------------------|
| 1 | (aged or homes for the aged or elderly or geriatr* or older patient* or old patient* or older person* or old person* or older adult* or old adult* or adult*).mp. |
| 2 | (vital statistics or morbidity or mortality or incidence or prevalence or hospital* or general practitioner* or disease burden).mp.                               |
| 3 | (respiratory syncytial virus vaccine* or respiratory syncytial virus, human or human respiratory syncytial virus or rsv or bronchiolitis).mp.                     |
| 4 | 1 and 2                                                                                                                                                           |
| 5 | 3 and 4                                                                                                                                                           |
| 6 | (China or Chinese or Hong Kong or Taiwan or Macao).mp.                                                                                                            |
| 7 | 5 and 6                                                                                                                                                           |
| 8 | limit 7 to (English language and yr="2000 - 2023")                                                                                                                |

\* is a symbol that broadens a search term by finding words that start with the same letters

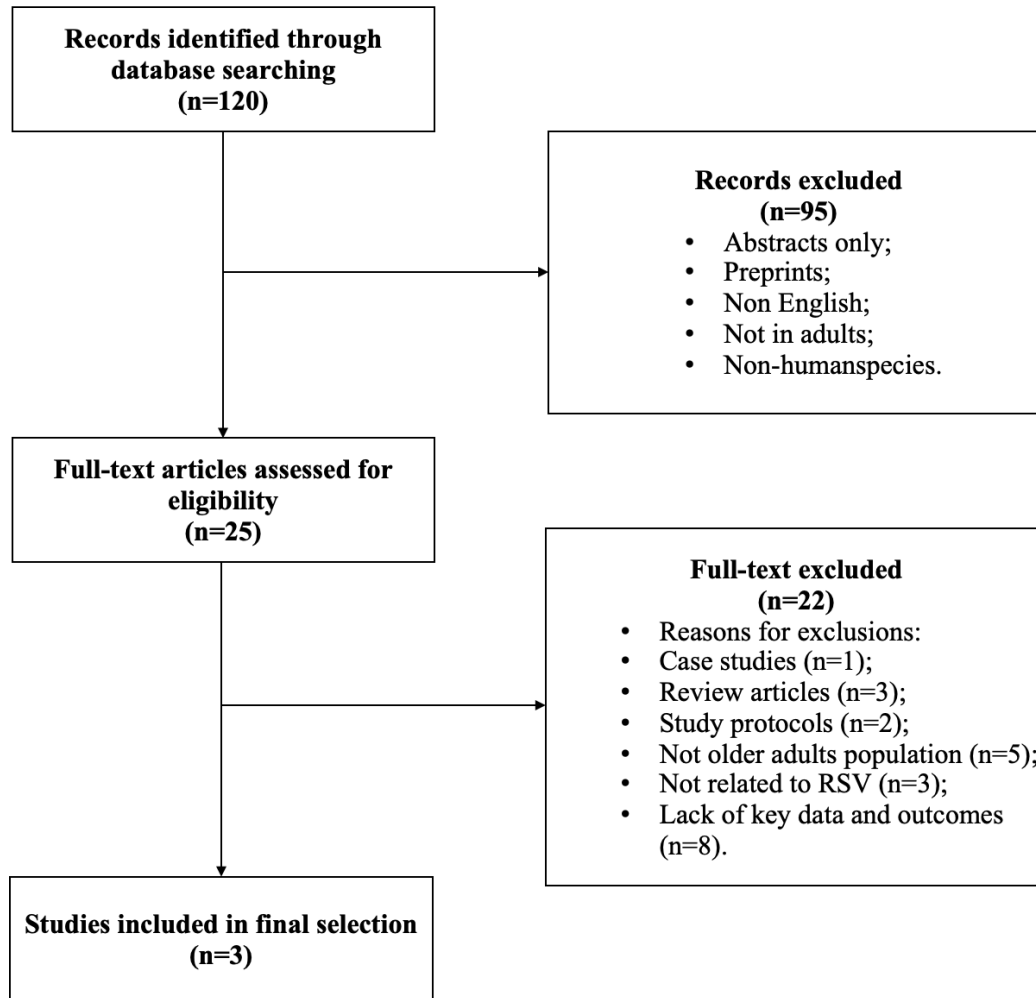

**Figure S1.** Flow diagram of literature search and selection process for clinical inputs

**Table S2.** Threshold values of influential parameters on the ICER of AREXVY® (versus no vaccination) in one-way sensitivity analysis at 25% US vaccine price level

| Parameters                                                    | Base-case value | Threshold value* |
|---------------------------------------------------------------|-----------------|------------------|
| Multiplier for under-detection of RSV by rapid antigen assays | 3.47            | <3.35            |
| Vaccine efficacy against RSV-ARI in season 2                  | 27.8%           | <23.08%          |
| RSV attack rate                                               | 1.62%           | <1.23%           |
| Vaccine efficacy against RSV-ARI in season 1                  | 79%             | <74.43%          |
| Age $\geq 75$ years                                           | 80              | >81.88           |
| RSV mortality rate (per 10,000 population) in $\geq 75$ years | 0.8263          | <0.7610          |
| Length of hospitalization days                                | 12              | <9.64            |
| Utility score of self-managed care for RSV                    | 0.82            | >0.88            |
| Vaccine efficacy against RSV-LRTD in season 2                 | 52.9%           | <29.22%          |
| Utility score of RSV uninfected                               | 0.896           | <0.866           |
| Utility score of outpatient care for RSV                      | 0.75            | >0.81            |
| Proportion of RSV-ARI among RSV infections                    | 84.2%           | >93.39%          |
| RSV mortality rate (per 10,000 population) in 65-74 years     | 0.1423          | <0.1155          |
| Vaccine efficacy against RSV-LRTD in season 1                 | 87.5%           | <64.61%          |

RSV: respiratory syncytial virus; ARI: acute respiratory infection; LRTD: lower respiratory tract illness.

\*The ICER (base-case value= 47,485 USD/QALY gained) exceeded the WTP threshold (49,594 USD/QALY gained) when the parameters crossed the threshold values.
